1 **TITLE:** Environmental correlates and functional consequences of bill divergence in island song  
2 sparrows

3

4 Maybellene P. Gamboa<sup>1</sup>

5 Cameron K. Ghalambor<sup>2,3</sup>

6 T. Scott Sillett<sup>4</sup>

7 W. Chris Funk<sup>2</sup>

8 Ross A. Furbush<sup>5</sup>

9 Jerry F. Husak<sup>6</sup>

10 Raymond M. Danner<sup>7</sup>

11

12 <sup>1</sup>Department of Organismal Biology & Ecology, Colorado College, Colorado Springs, CO  
13 80903, USA

14 <sup>2</sup>Department of Biology, Colorado State University, Fort Collins, CO 80523, USA

15 <sup>3</sup>Department of Biology, Centre for Biodiversity Dynamics (CBD), Norwegian University of  
16 Science and Technology (NTNU), N-7491, Trondheim, Norway

17 <sup>4</sup>Migratory Bird Center, Smithsonian Conservation Biology Institute, National Zoological Park,  
18 Washington, DC 20013, USA

19 <sup>5</sup>Tambopata Center for Education, Science and Conservation, CECCOT-Hacienda Herrera, Rio  
20 Madre de Dios, Tambopata, Peru

21 <sup>6</sup>Department of Biology, University of St. Thomas, St. Paul, MN 55105

22 <sup>7</sup>Department of Biology and Marine Biology, University of North Carolina-Wilmington,  
23 Wilmington, NC 28403

24

25 Corresponding Author: Maybellene P. Gamboa

26 Corresponding Author E-mail: [mgamboa@coloradocollege.edu](mailto:mgamboa@coloradocollege.edu)

27

28 Keywords: multifunctional trait, foraging efficiency, bite force, thermoregulation, *Melospiza*  
29 *melodia*, California Channel Islands

30 **SUMMARY STATEMENT**

31 Island song sparrow bill differences are correlated with climate, not vegetation, and  
32 experimental evidence finds no functional effect on foraging efficiency. This suggests many  
33 factors shape this multifunctional trait.

34

35 **ABSTRACT**

36 Inferring the environmental selection pressures responsible for phenotypic variation is a  
37 challenge in adaptation studies as traits often have multiple functions and are shaped by complex  
38 selection regimes. We provide experimental evidence that morphology of the multifunctional  
39 avian bill is related to climate, not foraging efficiency, in song sparrows (*Melospiza melodia*) on  
40 the California Channel Islands. Our research builds on a study in song sparrow museum  
41 specimens that demonstrated a positive correlation between bill surface area and maximum  
42 temperature, suggesting a greater demand for dry heat dissipation in hotter, xeric environments.  
43 We sampled contemporary sparrow populations across three climatically distinct islands to test  
44 the alternate hypotheses that song sparrow bill morphology is either a product of vegetative  
45 differences with functional consequences for foraging efficiency or related to maximum  
46 temperature and, consequently, important for thermoregulation. Measurements of >500 live  
47 individuals indicated a significant, positive relationship between maximum temperature and bill  
48 surface area when correcting for body size. In contrast, maximum bite force, seed extraction  
49 time, and vegetation on breeding territories (a proxy for food resources) were not significantly  
50 associated with bill dimensions. While we cannot exclude the influence of foraging ability and  
51 diet on bill morphology, our results are consistent with the hypothesis that variation in song  
52 sparrows' need for thermoregulatory capacity across the northern Channel Islands selects for  
53 divergence in bill surface area.

54

55 **INTRODUCTION**

56 Determining the environmental factors that drive adaptation in traits is a central goal in  
57 evolutionary biology, but this is often challenging in natural populations (Kawecki and Ebert,  
58 2004; MacColl, 2011; Reznick and Travis, 1996). Such challenges arise because traits may serve  
59 different functions such that the observed phenotypic variation is a product of multifarious  
60 selection pressures (e.g., Egea-Serrano et al., 2014; Pfrender, 2012; Shultz and Burns, 2017;

61 Templeton and Shriner, 2004; Wilkins et al., 2013). Multiple selection pressures can act either  
62 synergistically, shifting the population phenotypic mean towards a predictable adaptive  
63 optimum, or act antagonistically such that the observed phenotypic means represents a  
64 compromise, or trade-off between different functions (Svensson and Calsbeek, 2012). This  
65 concept of adaptation as a compromise between different functions is reinforced by empirical  
66 studies of natural populations (e.g., Egea-Serrano et al., 2014; Ghalambor et al., 2003; Kim et al.,  
67 2011; Robinson et al., 2006). Thus, testing which aspects of the environment act as important  
68 selection pressures requires consideration of the different functions of a given trait and the  
69 functional consequences associated with shifting trait means (Ghalambor et al., 2003; Jones et  
70 al., 1977).

71         The avian bill is one of the most studied multifunctional, morphological traits. The bill is  
72 involved in many fitness-related behaviors including ectoparasite removal (Clayton et al., 2005),  
73 communication (Ballentine, 2006; Podos, 2001), tool creation and use (Fayet et al., 2020; Rutz et  
74 al., 2016; Troscianko et al., 2012), thermoregulation (Greenberg et al., 2012; Ryeland et al.,  
75 2017; Symonds and Tattersall, 2010), and, most notably, food acquisition (Barbosa and Moreno,  
76 1999; Benkman, 1993; Temeles and Kress, 2003). Consequently, predicting local optima for bill  
77 sizes is difficult given the potentially conflicting functional demands. For example, an increase  
78 in bill morphology in the Darwin's finches is associated with improved foraging efficiency on  
79 hard seeds, yet it is also predicted to cause correlated changes in syllable rate and frequency  
80 bandwidth of vocal signals, which alters song production (Podos and Nowicki, 2004).  
81 Furthermore, finches with increased bill surface area have greater heat dissipation, which is  
82 hypothesized to improve thermoregulatory function (Tattersall et al., 2018). Similar interspecific  
83 patterns of bill divergence correlated with multiple environmental drivers and resulting in  
84 functional consequences have been documented in other passerines as well (Friedman et al.,  
85 2019). Bill morphology in any bird species is, therefore, a product of trade-offs among multiple  
86 selection pressures including, but not limited to, climate, food resources, and vocal signaling.  
87 Bill dimensions also have a strong genetic component, indicating that this important trait can  
88 readily evolve in response to selection (Åkesson et al., 2008; Boag, 1983; Grant, 1983; Jensen et  
89 al., 2003; Keller et al., 2001). Given that the strength of selection may shift over time and space  
90 (Siepielski et al., 2009; Siepielski et al., 2013), investigating avian bill morphology differences

91 among environments and populations can provide insight into how multiple selection pressures  
92 act to generate and maintain variation.

93         The relationship between bill morphology and foraging ability has received extensive  
94 attention, with numerous empirical studies finding correlations between bill size and  
95 characteristics of available food resources or foraging ability (e.g., Langin et al., 2015; Nebel et  
96 al., 2005; Temeles et al., 1993). For instance, bill depth in the medium ground finch (*Geospiza*  
97 *fortis*) is positively correlated with the abundance of large, hard seeds, and evolution in response  
98 to fluctuations in seed availability across years results in rapid adaptation (Grant and Grant  
99 2006). Relatively small modifications in bill morphology among Darwin's finches result in  
100 functional differences in bite force (Herrel et al., 2010). This strong selection pressure on bill  
101 morphology for improved foraging ability has resulted in diversification and adaptive radiation  
102 in several avian families (Benkman, 2003; Burns et al., 2003; Grant and Grant, 2002;  
103 Lamichhaney et al., 2015; Lerner et al., 2011; Parchman et al., 2006). These striking results  
104 coupled with other empirical studies suggest bill morphology should be strongly associated with  
105 foraging and dietary resources. Yet, selection for foraging efficiency may not operate in isolation  
106 from other environmental and ecological drivers.

107         The avian bill has also been studied in the context of thermoregulation and, specifically,  
108 heat dissipation (Tattersall et al., 2016). The bird bill is an exposed, vascularized network that  
109 exchanges heat directly with the environment, thereby acting as a 'thermal window' between  
110 internal temperature and external, ambient temperature (Hagan and Heath, 1980; Symonds and  
111 Tattersall, 2010; Tattersall et al., 2009). Increased blood flow to the vascularized region of the  
112 bill results in increased heat dissipation (Tattersall et al., 2016). By dissipating dry heat through  
113 radiation rather than panting, birds in arid, xeric environments may reduce evaporative water loss  
114 while maintaining body temperature equilibrium (Dawson, 1981; Tattersall et al., 2016).  
115 However, selection for large bills to increase thermoregulatory capacity could also impact diet  
116 depending on the availability of food resources and on how strongly bill dimensions affect  
117 functionality, namely in bite force and seed extraction (Herrel et al., 2010; Soons et al., 2015;  
118 van der Meij and Bout, 2004). Thus, testing the relative importance of food resources and  
119 climate on bill variation and evaluating the functional consequences of population shifts in bill  
120 morphology allows for inferring how selection operates on integrated traits.

121 Here, we investigate the relationship between variation in bill surface area, feeding  
122 performance, and climate in song sparrows (*Melospiza melodia*) breeding on the California  
123 Channel Islands. These island populations provide a model system for investigating how  
124 environmental factors influence adaptation in bill morphology. Song sparrows are continuously  
125 distributed along a climatic gradient ranging from cold, wet, and very windy on San Miguel and  
126 Santa Rosa Islands to hot, arid, and less windy on Santa Cruz and Anacapa Islands (Schoennerr  
127 et al., 1999; Fig. 1). In this system, maximum island temperature has been shown to be positively  
128 correlated with bill surface area of song sparrow museum specimens and implicated in aiding in  
129 thermoregulation (Greenberg and Danner, 2012). Yet, the islands' west-to-east climate gradient  
130 is also associated with vegetation differences (Junak et al., 2007) that could affect song sparrow  
131 habitat composition and food availability. We sampled contemporary sparrow populations across  
132 three climatically distinct islands (San Miguel, Santa Rosa, and Santa Cruz Islands) to test two  
133 hypothesized functional adaptations in song sparrow bills: thermoregulation and foraging  
134 efficiency. If bill morphology is acting as a thermoregulatory trait, we predicted that variation  
135 among song sparrow populations would be correlated with climatic differences across islands. If  
136 foraging efficiency explained variation in bill morphology, we predicted that bite force or seed  
137 extraction time would change as a function of bill dimensions, given that song sparrows  
138 primarily consume seeds during the non-breeding season (Arcese et al., 2002). We additionally  
139 assessed plant composition in song sparrow habitats (a proxy for food resources) across the three  
140 islands. Our combined assessments of the environmental correlates and functional consequences  
141 of bill variation allowed us to infer how complex selection regimes shape individual morphology  
142 and feeding performance.

143

## 144 **MATERIALS & METHODS**

### 145 *Animal capture and morphological measurements*

146 We captured and measured song sparrows on San Miguel, Santa Rosa, and Santa Cruz  
147 Islands during three breeding seasons (February-June 2014-2016). All birds were target-captured  
148 using mist-nets and song playback in the morning (thirty minutes before sunrise to four hours  
149 after sunrise) when territory defense and foraging activities are high. We measured bill  
150 dimensions (depth, width, and length) from the anterior edge of the nares (Fig. 1B,C),  
151 tarsometatarsus length, wing length (0.01 mm precision), and mass. Estimates of bill depth,

152 width, and length were used to generate total bill surface area, following Greenberg and Danner  
153 (2012). When comparing bill surface area among populations, we used the residual of a linear  
154 regression model with bill surface area as the response ( $bill_{sc}$ ) and the first principal component  
155 of an analysis of tarsometatarsus length and wing length ( $PC1_{bod}$ ) as the predictor (Greenberg  
156 and Danner, 2012). Tarsometatarsus and wing lengths are indicators of structural body size in  
157 birds, and this approach allows us to control for allometry (Rising and Somers, 1989). Negative  
158 values for residual bill surface area are indicative of smaller bill sizes than predicted by body  
159 sizes alone and, conversely, positive values suggest larger bill sizes than predicted by body sizes  
160 alone.

161 We applied nonparametric tests in R (R Core Team 2020) to determine whether raw  
162 (uncorrected for body size;  $bill_{raw}$ ) and residual (corrected for body size;  $bill_{sc}$ ) bill surface area  
163 differed by island. Specifically, we used Kruskal-Wallis tests (*kruskal.test*) to assess whether  
164 island raw and residual bill surface area mean ranks differed, while accounting for unequal  
165 variances. We did not include sex in our models, because body size corrections account for  
166 allometric differences between males and females. To further investigate island differences, we  
167 performed post-hoc, pairwise comparisons of island mean ranks and output 95% confidence  
168 intervals around estimated differences using Mann-Whitney U tests (*wilcox.test*) with Bonferroni  
169 corrections for multiple-testing.

#### 170 ***Testing if song sparrows experience different thermal environments and habitats***

171 We extracted climate data at 1 km<sup>2</sup> (30s) spatial resolution from WorldClim v. 1.4  
172 (Hijmans et al., 2005) for all sampling locations using ArcGIS v. 10.4 (ESRI 2011) to test if  
173 birds on different islands experience different temperatures. Minimum, maximum, and mean  
174 monthly temperatures were highly correlated ( $r^2 > 0.7$ ). Based on previous work showing a  
175 significant, positive correlation between residual bill surface area and maximum temperature  
176 (Greenberg and Danner, 2012), we limited our analyses to maximum temperature and extracted  
177 monthly temperatures in July, the hottest month of the year on average for the northern Channel  
178 Islands. Extracted maximum temperature values ( $T$ ) served as a proxy for climate in individual  
179 song sparrow territories. As with analyses of bill dimensions, we performed a nonparametric  
180 Kruskal-Wallis test to compare island mean ranks and quantified pairwise differences in island  
181 mean ranks and 95% confidence intervals using post-hoc Mann-Whitney U tests.

182 Song sparrows generally occupy low shrubland and, occasionally, riparian and coastal  
183 sage scrub habitat across the Channel Islands (Shuford and Gardali, 2008). To infer if sparrows  
184 use different habitats with different plant species (a proxy for dietary resources), we conducted  
185 vegetation surveys within a 25-meter radius of each mist-net location for sampled birds. Because  
186 sampling occurred during the breeding season, these measurements were taken within the  
187 approximated territories of sampled birds and, thus, reflect the plant species available. We  
188 recorded dominant woody vegetation type to the species level, when possible, for all plants that  
189 comprised >50% of the total area. Additionally, we identified commonly occurring vegetation  
190 types and categorized the relative abundance of these vegetation types at all sparrow sampling  
191 sites. Presence and coverage of vegetation types within the sampling area was recorded using a  
192 ranked scale including absent (0%; 1), trace (<10%; 2), some (10-25%; 3), prominent (25-50%;  
193 4), and dominant (>50%; 5). To infer island-level vegetative differences among song sparrow  
194 territories, we used Fisher's exact test in R (*fisher.test*) to test for an association between ranked  
195 abundance of vegetation types and island. We modeled the null distribution of the test statistic  
196 using 10,000 Monte Carlo simulations, allowing us to estimate the p-value under the null  
197 hypothesis that the abundance of different vegetation types is independent of the island sampled.

198 We modeled vegetation for individual sampling locations by transforming ordinal  
199 vegetation data to quantitative dimensions using nonlinear principal components analysis  
200 (NLPCA) implemented in the R package *Gifi* (Mair and de Leeuw, 2019). This multivariate  
201 method reduced the complexity of correlated vegetation variables to two principal components in  
202 ordination space while accounting for ranked abundance of each vegetation type. We visually  
203 inspected NLPCA results and assessed loadings of categorical values on dimensional space to  
204 infer what factors drive variation in the first two axes of variation ( $PC1_{veg}$  and  $PC2_{veg}$ ) among  
205 song sparrow territories. We plotted individual sampling locations in vegetation space along  
206  $PC1_{veg}$  and  $PC2_{veg}$  axes and constructed 95% kernel density contours to visually assess overlap  
207 among islands in vegetation space. To statistically compare these reduced vegetation descriptors  
208 ( $PC1_{veg}$  and  $PC2_{veg}$ ) among islands, we again applied a nonparametric Kruskal-Wallis test to  
209 account for unequal variances. We performed post-hoc Mann-Whitney U tests with Bonferroni  
210 corrections and extracted estimated island means and 95% confidence intervals around these  
211 differences. NLPCA dimensions ( $PC1_{veg}$  and  $PC2_{veg}$ ) were used for subsequent tests relating  
212 habitat and residual bill surface area.



213 We performed linear regression to determine whether vegetation and climate were  
214 significant predictors of residual bill surface area. We used the R function *lm* to model residual  
215 bill surface area as predicted by maximum temperature and two vegetation dimensions ( $PC1_{veg}$   
216 and  $PC2_{veg}$ ) resulting from NLPCA of all vegetation sampling sites. We generated 95%  
217 confidence intervals around unstandardized beta estimates using the function *confint* in the base  
218 *stats* package in R and extracted standardized beta coefficients for all predictors using the R  
219 package *lm.beta* (Behrendt, 2014). Unstandardized and standardized beta coefficients allowed us  
220 to evaluate the relative importance of climate versus vegetation (a proxy for diet) for predicting  
221 variation in song sparrow bill surface area.

### 222 ***Measuring maximum bite force to infer the functional consequences of bill variation***

223 To determine whether divergence in bill morphology results in functional consequences  
224 for food acquisition, we compared bill functional morphology between Santa Cruz and San  
225 Miguel Island song sparrows. We expected functional differences to be largest between these  
226 populations based on pronounced climate differences between islands and on phenotypes  
227 observed in museum specimens by Greenberg and Danner (2012). All sampling and estimates of  
228 bite force were performed in early spring 2014, when birds are primarily foraging on seeds. We  
229 measured maximum bite force in the field using a custom-manufactured force meter (Herrel et  
230 al., 2005; van der Meij and Bout, 2004). Briefly, we used a piezoelectric isometric force  
231 transducer (type 9203, Kistler, Switzerland) fitted to custom-built stainless-steel bite plates  
232 (specifications in Herrel et al., 1999) and connected to a charge amplifier (type 5995, Kistler,  
233 Switzerland). A micrometer head allowed adjustment of the spacing between bite plates. For  
234 each measurement, we held the bird upright and positioned the bite force meter between the  
235 mandible and maxilla. We positioned the ends of the plates two-thirds of the distance from the  
236 bill tip to commissure, the location where song sparrows crush seeds (Danner, *pers. obs.*). The  
237 meter had a precision of 0.1 Newtons. We recorded the maximum bite force over a period of 15  
238 seconds. Birds were gently coaxed to open the bill by tapping on the tomia with a thin, metal  
239 spade. Preliminary analyses on song sparrows indicated that bite force did not decline across  
240 observations when measurements were interspersed with 15-second rest intervals (Danner, *pers.*  
241 *obs.*). Thus, we recorded three measurements per bird with one-minute rest intervals to ensure  
242 recovery and used the maximum bite force for all further analyses. All morphological  
243 measurements were taken shortly before releasing the birds to minimize the effect of handling



244 stress on bite force and seed extraction trials. We maintained the same force meter settings for all  
245 individuals.

246 To assess the relationship between bill dimensions and bite force, we performed multiple  
247 regression analysis. We included bill depth and body size as predictors, because these traits have  
248 been found to strongly predict bite force in other passerines (Herrel et al., 2005; Soons et al.,  
249 2015; Van Der Meij and Bout, 2008). We generated a composite score of body size ( $PC1_{\text{bod}}$ )  
250 using PCA of tarsometatarsus and wing lengths for individuals used in bite force analyses. We  
251 applied linear regression in R using the function *lm* with bill depth and  $PC1_{\text{bod}}$  as our predictors  
252 for maximum bite force. We did not include island sampled in our analyses as this was not  
253 independent of bill dimensions. We extracted standardized beta coefficients and 95% confidence  
254 intervals around unstandardized beta coefficients to compare the effects of both predictors on  
255 maximum bite force.

### 256 ***Quantifying seed extraction time to infer the functional consequences of bill variation***

257 We held a subset of captured males in 2014 for caged field trials to quantify foraging  
258 efficiency. Females were excluded from trials to prevent interruption of incubating or laying  
259 behaviors. Following capture, we immediately placed birds in covered trial cages for acclimation  
260 to experimental conditions (*see Fig. S1 for details*). All subjects were provided with water  
261 throughout the duration of the trial. We provided a two-hour acclimation and fasting period prior  
262 to the initiation of each trial. During the acclimation period, we monitored activity continuously  
263 via video cameras. Following acclimation, we initiated recording and slowly poured 10 grams of  
264 sterilized nyjer seed (*Guizotia abyssinica*) through a funnel in a brown plastic tube, which  
265 dispersed seeds across the floor of the cage. Sterilized nyjer seed is commonly used as bird feed  
266 for small passerines, and sterilization ensures the subsequent germination does not occur.  
267 Although *G. abyssinica* is not found on the Channel Islands and may not represent typical seed  
268 resources, song sparrows are generalist, ground-foragers. Thus, we assumed that our  
269 experimental food provisioning method facilitated normal foraging behavior. Trials lasted 45-  
270 120 minutes depending on latency to eat. We recorded behavioral notes during both acclimation  
271 and trial periods.

272 We reviewed foraging trial videos to quantify seed extraction time across multiple seeds.  
273 We counted the number of frames between when a bird's bill tip lifted from the floor of the cage  
274 with a seed, to when the husk fell from the tomium (van der Meij and Bout, 2006). We divided

275 the number of frames by the camera's frame capture rate (29.97 frames/second) to calculate seed  
276 extraction time. The high temporal resolution of the cameras provided a precision of 0.033  
277 seconds. We included only feeding events in which seed manipulation was observed throughout  
278 the entire seed extraction process.

279 Seed extraction is a complex task that requires manipulation of the bill along multiple  
280 axes. Consequently, we performed a PCA of bill depth, width, and length and used the first axis  
281 of variation ( $PC1_{\text{bill}}$ ) to test whether differences in bill morphology is result in differences in seed  
282 extraction time. We included  $PC1_{\text{bill}}$  of bill dimensions as a fixed effect in a linear mixed model  
283 predicting seed extraction time using the function *lmer* in the package *lme4* (Bates et al., 2015).  
284 We accounted for repeated observations of the same bird by including individual as a random  
285 effect. We extracted 95% confidence intervals around the estimated coefficient for  $PC1_{\text{bill}}$  using  
286 the function *confint* to infer the strength of  $PC1_{\text{bill}}$  in modifying seed extraction time.

287

## 288 **RESULTS**

### 289 ***Patterns of bill variation in contemporary populations***

290 From 2014–2016, we measured 542 adult song sparrows (San Miguel Island,  $n = 104$ ;  
291 Santa Rosa Island,  $n = 194$ ; Santa Cruz Island,  $n = 244$ ) sampled from 432 unique net locations  
292 (San Miguel Island,  $n = 68$ ; Santa Rosa Island,  $n = 141$ ; Santa Cruz Island,  $n = 223$ ; Fig. 1).  
293 Patterns of bill variation in contemporary populations aligned with our expectations based on  
294 previous research using museum specimens (Greenberg and Danner 2012). Islands differed  
295 significantly in mean ranks for both raw bill surface area ( $H_{df=2} = 138.30, P < 0.001$ ) and residual  
296 bill surface area ( $H_{df=2} = 143.96, P < 0.001$ ) using Kruskal-Wallis tests. We found all Mann-  
297 Whitney U pairwise comparisons of raw and residual bill surface areas between islands were  
298 significant (Table 1). We confirmed larger bills were found on Santa Cruz Island, medium bills  
299 were found on Santa Rosa Island, and the smallest bills were found among San Miguel Island  
300 birds based on Hodges–Lehmann estimates of medians (Table 1).

### 301 ***Maximum temperature and vegetation within breeding territories across islands***

302 Environmental conditions within song sparrow breeding territories differed among the  
303 432 unique sampling locations across islands (San Miguel Island,  $n = 68$ ; Santa Rosa Island,  $n =$   
304 141; Santa Cruz Island,  $n = 223$ ; Fig. 1). We found mean ranks in island maximum temperatures  
305 were significantly different ( $H_2 = 282.63, P < 0.001$ ). Post-hoc pairwise comparisons of

306 maximum temperature were significantly different between island pairs as expected, such that  
307 Santa Cruz Island had a higher and San Miguel has lower median estimates of maximum  
308 temperature in territories (Table 1). Additionally, we found ranked abundances in common  
309 vegetation types were significantly associated with island sampled using 10,000 Monte Carlo  
310 simulations in Fisher's exact test ( $P < 0.001$ ). Common dominant vegetation included coyote  
311 brush (*Baccharis pilularis*), toyon (*Heteromeles arbutifolia*), silver bush lupine (*Lupinus*  
312 *albifrons*), introduced sweet fennel (*Foeniculum vulgare*), and a mix of annual and perennial  
313 grasses (Table S1).

314 Using NLPCA, we reduced the complexity in correlated ranked abundance of vegetation  
315 types among sampling locations. The first two principal components explained a total of 52.7 %  
316 of the variation in vegetation. The first axis (PC1<sub>veg</sub>) explained 30.5% of the variation in  
317 vegetation, and the abundance of grasses and the joint effects of the abundance of lupine,  
318 miscellaneous forbs, and other substrates (*i.e.*, bare ground or rock, water) loaded in opposing  
319 directions (Fig. 2A). This suggests that positive values along PC1<sub>veg</sub> are indicative of territories  
320 with more lupine, forbs, and other substrates and less grass, and negative values represent the  
321 inverse of this relationship (Fig. 2A). The second axis of variation (PC2<sub>veg</sub>) explained 22.2% of  
322 variation in vegetation and reflects a trade-off in fennel and coyote brush (Fig. 2A). Positive  
323 values indicate more fennel and less coyote brush, and negative values represent less fennel and  
324 more coyote brush (Fig. 2A). We found islands overlapped in vegetation space based on 95%  
325 kernel density contours (Fig. 2B). We assessed these relationships statistically using  
326 nonparametric tests and found significant differences among island mean ranks in both  
327 vegetation dimensions (PC1<sub>veg</sub>,  $H_2 = 31.73$ ,  $P < 0.001$ ; PC2<sub>veg</sub>,  $H_2 = 241.85$ ,  $P < 0.001$ ; Table  
328 1). Using post-hoc Mann-Whitney U tests, we found PC1<sub>veg</sub> scores for Santa Rosa Island  
329 territories were more negative, such that territories on Santa Rosa Island had more grass and less  
330 miscellaneous forbs, bare ground and rock, open water, and lupine compared to Santa Cruz and  
331 San Miguel Islands (Fig. 2B). In contrast, we found PC2<sub>veg</sub> scores for Santa Cruz Island  
332 territories were significantly greater, with Santa Cruz territories encompassing more fennel and  
333 less coyote brush compared to Santa Rosa and San Miguel Islands (Fig. 2B).

334 Multiple regression analysis was used to assess the relative importance of vegetation  
335 (PC1<sub>veg</sub> and PC2<sub>veg</sub>) and maximum temperature in driving bill differences in adult song sparrows  
336 (Santa Cruz,  $n = 218$  birds, Santa Rosa,  $n = 146$  birds, San Miguel,  $n = 81$  birds). These variables

337 together explained a significant proportion of variation in residual bill surface area ( $F_{3,442} =$   
338  $55.25, p < 0.001$ , adjusted  $R^2 = 0.27$ ; Fig. 3). We found residual bill surface area was  
339 significantly predicted by maximum island temperatures ( $\beta_{\text{standardized}} = 0.40$ ,  $\beta_{\text{unstandardized}} = 3.06$   
340  $(2.20 - 3.93)$ ,  $t = 10.350$ ,  $P < 0.001$ ). Although we found island differences in vegetation space,  
341 neither  $PC1_{\text{veg}}$  ( $\beta_{\text{standardized}} = -0.05$ ,  $\beta_{\text{unstandardized}} = -0.28$   $(-0.77 - 0.20)$ ,  $t = -1.147$ ,  $P = 0.25$ ) nor  
342  $PC2_{\text{veg}}$  ( $\beta_{\text{standardized}} = 0.04$ ,  $\beta_{\text{unstandardized}} = 0.20$   $(-0.43 - 0.83)$ ,  $t = 0.610$ ,  $P = 0.54$ ) were  
343 significant predictors. Vegetation space was used as a proxy for available food resources, and  
344 these results suggest climate, not food, is likely driving differences in residual bill surface area.

### 345 ***Functional consequences of bill variation between island populations***

346 Contrary to predictions from the foraging efficiency hypothesis, we did not find evidence  
347 that differences in bill morphology result in functional differences in bite force between birds on  
348 San Miguel ( $n = 28$ ) and Santa Cruz Island ( $n = 28$ ). Body size ( $PC1_{\text{bod}}$ ) and bill depth together  
349 explained very little of the variation in maximum bite force ( $F_{2,53} = 1.45$ ,  $P = 0.24$ , adjusted  $R^2 =$   
350  $0.02$ ; Fig. 4A). Although Santa Cruz Island birds tended to have larger structural bodies  
351 ( $PC_{\text{bod}(\text{Cruz})}$ ,  $\text{mean} \pm \text{sd} = 0.22 \pm 1.09$ ;  $PC_{\text{bod}(\text{Miguel})}$ ,  $\text{mean} \pm \text{sd} = -0.22 \pm 1.02$ ), body size distributions  
352 generally overlapped and did not significantly predict maximum bite force ( $\beta_{\text{standardized}} = 0.17$ ,  
353  $\beta_{\text{unstandardized}} = 0.23$   $(-0.14 - 0.59)$ ,  $t = 1.247$ ,  $P = 0.22$ ). Island sampling groups differed in bill  
354 depth as expected with birds on Santa Cruz Island having deeper bills ( $\text{Depth}_{(\text{Cruz})}$ ,  $\text{mean} \pm \text{sd} =$   
355  $6.15 \pm 0.21$ ;  $\text{Depth}_{(\text{Miguel})}$ ,  $\text{mean} \pm \text{sd} = 5.54 \pm 0.20$ ; Fig. 4A). Yet, we found little evidence to suggest  
356 that these differences in depth result in synonymous changes in maximum bite force ( $\beta_{\text{standardized}} =$   
357  $0.17$ ,  $\beta_{\text{unstandardized}} = -0.74$   $(-1.80 - 0.32)$ ,  $t = -1.394$ ,  $P = 0.17$ ).

358 We performed foraging trials in adult, male song sparrows from Santa Cruz Island ( $n =$   
359  $23$ ) and San Miguel Island ( $n = 10$ ), and, again, found little evidence for an effect of bill  
360 morphology on seed extraction time. The first principal component ( $PC1_{\text{bill}}$ ) in a PCA of bill  
361 depth, width, and length explained 58% of the variation in bill dimensions and was largely  
362 driven by bill depth and width (Fig. S2). San Miguel Island and Santa Cruz Island birds  
363 overlapped along PC1 (Fig. 4B), but San Miguel birds loaded more positively (shallower,  
364 narrower, slightly longer bills). In contrast, Santa Cruz Island birds loaded more negatively,  
365 suggesting birds tended to have deeper, wider, slightly shorter bills. The mean number of  
366 observed extracted seeds was 60 seeds per individual ( $\text{sd} = 32$ ,  $\text{range} = 8 - 163$ ), and 13% of  
367 variance was explained by individual effects.  $PC1_{\text{bill}}$  had a very weak to negligible effect on seed

368 extraction time ( $\beta = 0.009$  (-0.14 – 0.16),  $t_{32} = 0.115$ ,  $P = 0.91$ ). These results combined with bite  
369 force analyses suggest that morphological differences in bills do not facilitate differences in  
370 foraging efficiency in island song sparrows.

371

## 372 **DISCUSSION**

373 Identifying the ecological correlates of phenotypic variation provides insights into the  
374 selection pressures that may shape complex traits and their multiple functions. The avian bill is  
375 one such complex trait that has primarily been studied in the context of foraging ability despite  
376 its critical role in preening, communication, and thermoregulation. Indeed, there has been  
377 growing appreciation for the role of climate in shaping variation in bill morphology, as mounting  
378 evidence suggests the bill is an important tool for heat dissipation and thermoregulation (e.g.,  
379 Gardner et al., 2016; Greenberg and Danner, 2013; Ryeland et al., 2017; Symonds and Tattersall,  
380 2010). Here, we tested whether climate and/or vegetation composition within breeding territories  
381 significantly predicted bill variation in song sparrows on the California Channel Islands (i.e., San  
382 Miguel, Santa Rosa, and Santa Cruz Islands). We confirmed that bill size, maximum  
383 temperature, and vegetation composition differed among islands. However, only maximum  
384 temperature significantly predicted residual bill surface area in a multiple regression analysis  
385 including vegetation dimensions ( $PC1_{veg}$  and  $PC2_{veg}$ ) and temperature as predictors (Fig. 3). We  
386 did not find a significant relationship between bill morphology and either maximum bite force or  
387 seed extraction time. This provides additional evidence against foraging efficiency as a strong  
388 selective pressure in this system. Together, these results suggest that climate may be more  
389 important than diet and foraging ability in the evolution of a complex phenotype in song  
390 sparrows on the California Channel Islands.

### 391 ***Vegetation differences do not directly result in concerted changes in bill morphology***

392 Analysis of habitat composition with respect to vegetation provides key insights into the  
393 potential food resources available for breeding birds. Because song sparrows on the Channel  
394 Islands occupy a strong east-west climate gradient, we expected some degree of habitat  
395 differences among island breeding sites. Thus, it is not surprising that ranked abundance in our  
396 focal vegetation categories were significantly associated with island sampled. For example,  
397 Santa Cruz Island is characterized by greater heterogeneity in topography, soil composition, and  
398 climate, which is correlated with increases in species richness and diversity of plants compared

399 to Santa Rosa and San Miguel Islands (Schoennerr et al., 2003). Our results demonstrate  
400 increased diversity in vegetation space ( $PC1_{veg}$  and  $PC2_{veg}$ ) within Santa Cruz Island territories  
401 (Fig. 2B). Yet, 95% kernel density contours also suggest a large proportion of overlap in  
402 vegetation space among islands (Fig. 2B), and similar plant taxa identifiable to the genus and  
403 species level were present across all islands (Table S1). More extensive vegetation and habitat  
404 sampling may allow us to parse out fine-scale habitat differentiation among islands, but whether  
405 any differences in vegetation result in differences in food resources is uncertain. Direct  
406 observation of foraging behavior and evaluation of the available dietary resources during the  
407 non-breeding season, when song sparrows most heavily rely on seeds, would allow us to draw  
408 stronger inferences regarding the relationship among foraging ability, diet, and bill morphology.  
409 Nevertheless, our analyses support the hypothesis that climate may facilitate vegetative  
410 differences among song sparrow territories, but differences in vegetation did not directly predict  
411 bill morphology in multiple regression analyses. Hence, vegetation, a proxy for food resources  
412 and diet, may not be a strong selective pressure generating bill variation across islands, and we  
413 found further evidence against selection operating on foraging ability in experimental tests of  
414 foraging efficiency (Figs. 4A-B).

#### 415 ***Variation in bill morphology does not result in differences in foraging efficiency***

416 We did not find a relationship between variation in bill morphology and either bite force  
417 or seed extraction time (Fig. 4A-B), despite evidence that bill dimensions affect feeding  
418 performance in other passerines (Anderson et al., 2008; Herrel et al., 2005; Navalón et al., 2019).  
419 Indeed, some of the most well-documented cases of specialization in resource acquisition with  
420 respect to bill variation occur in island systems (Burns et al., 2003; Grant and Grant, 2002). Of  
421 these cases, Darwin's ground finches (*Geospiza sp.*) are perhaps most notable and ecologically  
422 similar to song sparrows in their foraging behavior and diet (De León et al., 2014). In Darwin's  
423 finches, birds exhibit correlations between both bill dimensions and bite force (Herrel et al.,  
424 2005; van der Meij and Bout, 2008; Soons et al., 2015) and bill dimensions and seed extraction  
425 times (van der Meij and Bout, 2008). The discordance between our results and findings from  
426 studies of Darwin's finches may be attributed to multiple factors.

427 First, sparrows are generalist foragers with a heavy insectivorous diet during the breeding  
428 season and a transition to a granivorous diet during the non-breeding season (Arcese et al.,  
429 2002), whereas Darwin's ground finches' diets consist primarily of seeds throughout the year



430 (De León et al., 2014). Specialization on seeds and food limitation in ground finches facilitate  
431 competitive interactions among species that overlap in their dietary niches (De León et al.,  
432 2014), resulting in strong selection on individuals to optimize bill morphology for increased  
433 foraging efficiency. On the California Channel Islands, it is unclear whether food resources are  
434 limited and whether food limitation imposes a strong selective pressure on song sparrow  
435 populations. Mass comparisons between sparrows from the Channel Islands and nearby mainland  
436 California found island sparrows to heavier than mainland sparrows when correcting for  
437 structural body size, suggesting island birds may be in better condition (Danner et al., 2014).  
438 Increased mass among island sparrows supports the hypotheses that food resources are not  
439 limited and reduced interspecific competition for food favors the sparrows' generalist diets  
440 (Blondel, 2000; Clegg, 2010; Diamond, 1970; Keast, 1970; Scott et al., 2003). As a result,  
441 variation in bill morphology may be decoupled from foraging efficiency traits measured in this  
442 study.

443         Additionally, methodological limitations may have prevented us from quantifying key  
444 traits associated with foraging. For example, previous research in Darwin's finches identify a  
445 link between muscle mass and maximum bite force (Herrel et al., 2005; Herrel et al., 2010;  
446 Soons et al., 2015), and other skeletal features are correlated with bite force and closing velocity  
447 (Corbin et al., 2015). These methods require analysis of euthanized individuals, which we were  
448 unable perform. Here, we evaluated bite force differences elicited from the posterior section of  
449 the bill, not from the anterior (the tip) where functional differences in grasping and object  
450 manipulation occur across avian families (Clayton et al., 2005; Demery et al., 2011; Gentle et al.,  
451 1982; Sustaita, 2007). Although skeletal structures associated with foraging traits are highly-  
452 correlated (Van Der Meij and Bout, 2008) and our measures adequately estimate a large  
453 proportion of variation in overall bill morphology, future studies may examine unmeasured  
454 phenotypic traits in this study to better estimate the functional consequences of craniofacial  
455 variation. Finally, we were limited to using readily available bird seed for foraging trials to  
456 increase our ability to observe detailed manipulation of the food resource. We did not compare  
457 nyjer seed characteristics with those used by song sparrows on the Channel Islands during the  
458 winter months. Yet, seed availability during winter months were likely similar given that non-  
459 native, seed-producing plant species (e.g., annual grasses) are widespread (Junak et al., 2007)  
460 and were present at most sampling locations (Table S1). Sample size does not appear to be an



461 issue, as a power analysis suggests that our sample sizes were sufficient to detect a biologically  
462 relevant difference in maximum bite force given our experimental design (Fig. S3). Although we  
463 did not find evidence that foraging efficiency is an important driver of variation in bill shape in  
464 our study populations, further research is needed to definitively exclude the possibility that  
465 differing food resources among islands is a selective force. Our experimental design provides a  
466 framework for future studies to test how bill dimensions influence multiple components of  
467 foraging efficiency (i.e., both bite force and seed extraction).

#### 468 ***Evidence for the bill as a thermoregulatory trait in island sparrows***

469 Our results are consistent with the hypothesis that selection operates on the bill to  
470 improve thermoregulatory ability in passerines occupying xeric environments. Increasing  
471 empirical evidence demonstrate a relationship between climate and bill morphology that aligns  
472 with the thermoregulatory hypothesis (reviewed by Tattersall et al., 2016), and this relationship  
473 may be traced over evolutionary time (Campbell-Tennant et al., 2015). The ability to radiate heat  
474 from unfeathered structures is particularly important for small passerines, including song  
475 sparrows, which are more vulnerable to dehydration from evaporative water loss and, thus, more  
476 susceptible to adverse effects of thermal stress (Mckechnie and Wolf, 2010; Whitfield et al.,  
477 2015). Indeed, our results are consistent with previous research that identified a significant,  
478 positive correlation between climate and bill morphology in eastern and Atlantic song sparrows  
479 (Danner and Greenberg, 2014). A similar pattern has been described in Darwin's finches  
480 (Tattersall et al., 2018) and other similarly-sized passerines (Greenberg and Danner, 2012;  
481 LaBarbera et al., 2017; Laiolo and Rolando, 2001). The magnitude of the effect of climate in  
482 predicting bill morphology may change according to seasonality (Greenberg et al., 2013),  
483 environmental variation during development (Burness et al., 2013; Labarbera et al., 2020),  
484 habitat type (Luther and Greenberg, 2014), and sex (Greenberg and Danner, 2013). Importantly,  
485 selection may act simultaneously on other traits to facilitate thermoregulation, including internal  
486 nasal structures (Danner et al., 2017), plumage (Wolf and Walsberg, 2000), and physiological  
487 performance (e.g., Noakes et al., 2016; Tieleman et al., 2003; White et al., 2007; Whitfield et al.,  
488 2015). Thus, further research that explores the complex relationship between temperature,  
489 humidity, and other morphological and physiological traits is needed to better understand how  
490 climate facilitates and maintains phenotypic variation.

#### 491 ***Conclusions***

492 Consistent with previous studies using museum specimens, variation in bill morphology  
493 among contemporary song sparrow populations on the California Channel Island is correlated  
494 with maximum temperature, suggesting an important thermoregulatory function. Differences in  
495 the vegetation and habitats used by sparrows on different islands were not strongly predictive of  
496 observed bill divergence. Variation in bill morphology was also not correlated with bite force or  
497 seed extraction, perhaps because song sparrows are generalist foragers. We hope that our results  
498 encourage future research about how different environmental agents of selection simultaneously  
499 act on avian bills to optimize the multiple, fitness-related functions of foraging,  
500 thermoregulation, preening, and vocalization.

501

## 502 **ACKNOWLEDGEMENTS**

503 We dedicate this paper to our late colleague Dr. Russ Greenberg (1953-2013), who played a  
504 formative role in study design for this project. We acknowledge, honor, and respect the people of  
505 the Chumash Nation, the original stewards of coastal southern California and the Northern  
506 California Channel Islands [San Miguel (*Tuqan*), Santa Rosa (*Wi'ma*), Santa Cruz (*Limuw*), and  
507 Anacapa Islands (*Anyapakh*)]. We are grateful to the many agencies and individuals that aided in  
508 the collection of data through transportation and field support including The Nature Conservancy  
509 in California (Jennifer Baker, Christina Boser, David Dewey, and Eamon O'Byrne), UCSB Santa  
510 Cruz Island Reserve staff (Lyndall Laughrin, Lynn McLaren, and Brian Guerrero), Channel  
511 Islands National Park Service (Linda Dye, Tim Coonan, Ian Williams, Lulis Cuevas, Paula  
512 Power, David Mazurkiewicz, Kate Faulkner and Ken Convery), CSUCI Santa Rosa Island  
513 Research Station staff (Cause, Tracy, and Solstice Hanna, Robyn Shea, Aspen Coty, and Russell  
514 Bradley), and field technicians (Janelle Chojnacki, Carolyn Cummins, Graham Sorenson, Eamon  
515 Harrity, Angela Hsiung, and Kathryn Fleming).

516

## 517 **COMPETING INTERESTS**

518 The authors declare no competing or financial interests.

519

## 520 **AUTHOR CONTRIBUTIONS**

521 R.M.D., J.F.H., and T.S.S. designed the study. R.M.D. and M.P.G. collected field data with  
522 additional support from T.S.S. J.F.H. provided instrumentation for field data collection. R.A.F.

523 extracted foraging data from videos. M.P.G. conducted all analyses with support from R.M.D.  
524 The article was written by M.P.G. with additional input from C.A.M., W.C.F., T.S.S., J.F.H., and  
525 R.M.D.

526

## 527 **FUNDING**

528 This project was funded by The Nature Conservancy, the Smithsonian Institution Migratory Bird  
529 Center, and Channel Islands National Park (Award P16AC01699). Any opinions, findings and  
530 conclusions or recommendations expressed in this material are those of the author(s) and do not  
531 necessarily reflect the views of the aforementioned funding agencies.

532

## 533 **DATA AVAILABILITY**

534 Phenotypic and environmental data used for all analyses are available on Dryad  
535 (<https://doi.org/10.5061/dryad.wwpzgmsjc>)

536 ORCID: Maybellene P. Gamboa <https://orcid.org/0000-0002-7483-3385>

537

## 538 **REFERENCES**

539 **Åkesson, M., Bensch, S., Hasselquist, D., Tarka, M. and Hansson, B.** (2008). Estimating  
540 heritabilities and genetic correlations: comparing the “animal mode” with parent-offspring  
541 regression using data from a natural population. *PLoS One* **3**, e1739.

542 **Anderson, R. A., Mcbrayer, L. D. and Herrel, A.** (2008). Bite force in vertebrates:  
543 Opportunities and caveats for use of a nonpareil whole-animal performance measure. *Biol.*  
544 *J. Linn. Soc.* **93**, 709–720.

545 **Arcese, P., Sogge, M. K., Marra, A. B. and Patten, M. A.** (2002). Song sparrow (*Melospiza*  
546 *meldoia*). *Birds North Am. Online*.

547 **Ballentine, B.** (2006). Morphological adaptation influences the evolution of a mating signal.  
548 *Evolution* **60**, 1936–44.

549 **Barbosa, A. and Moreno, E.** (1999). Evolution of foraging strategies in shorebirds: an  
550 ecomorphological approach. *Auk* **116**, 712–725.

551 **Bates, D., Mächler, M., Bolker, B. M. and Walker, S. C.** (2015). Fitting linear mixed-effects  
552 models using lme4. *J. Stat. Softw.* **67**, 1–48.

553 **Behrendt, S.** (2014). lm.beta: add standardized regression coefficients to lm-objects.

554 **Benkman, C. W.** (1993). Adaptation to single resources and the evolution of crossbill (*Loxia*)  
555 diversity. *Ecol. Monogr.* **63**, 305–325.

556 **Benkman, C. W.** (2003). Divergent selection drives the adaptive radiation of crossbills.  
557 *Evolution* **57**, 1176–1181.

- 558 **Blondel, J.** (2000). Evolution and ecology of birds on islands: trends and prospects. *Vie Milieu*  
559 **50**, 205–220.
- 560 **Boag, P. T.** (1983). The heritability of external morphology in Darwin's ground finches  
561 (Geospiza) on Isla Daphne Major, Galapagos. *Evolution* **37**, 877–894.
- 562 **Burness, G., Huard, J. R., Malcolm, E. and Tattersall, G. J.** (2013). Post-hatch heat warms  
563 adult beaks: irreversible physiological plasticity in Japanese quail. *Proc. R. Soc. B Biol. Sci.*  
564 **280**, 20131436.
- 565 **Burns, K. J., Hackett, S. J. and Klein, N. K.** (2003). Phylogenetic relationships of neotropical  
566 honeycreepers evolution of feeding morphology. *J. Avian Biol.* **34**, 360–370.
- 567 **Campbell-Tennant, D. J. E., Gardner, J. L., Kearney, M. R. and Symonds, M. R. E.** (2015).  
568 Climate-related spatial and temporal variation in bill morphology over the past century in  
569 Australian parrots. *J. Biogeogr.* **42**, 1163–1175.
- 570 **Clayton, D. H., Moyer, B. R., Bush, S. E., Jones, T. G., Gardiner, D. W., Rhodes, B. B. and**  
571 **Goller, F.** (2005). Adaptive significance of avian beak morphology for ectoparasite control.  
572 *Proc. Biol. Sci.* **272**, 811–817.
- 573 **Clegg, S. M.** (2010). Evolutionary changes following island colonization in birds: empirical  
574 insights into the roles of microevolutionary processes. In *The theory of island biogeography*  
575 *revisited* (ed. Losos, J. B.) and Ricklefs, R. E.), pp. 293–325. Princeton, New Jersey:  
576 Princeton University Press.
- 577 **Clinchy, M., Sheriff, M. J. and Zanette, L. Y.** (2013). Predator-induced stress and the ecology  
578 of fear. *Funct. Ecol.* **27**, 56–65.
- 579 **Corbin, C. E., Lowenberger, L. K. and Gray, B. L.** (2015). Linkage and trade-off in trophic  
580 morphology and behavioural performance of birds. *Funct. Ecol.* **29**, 808–815.
- 581 **Danner, R. M. and Greenberg, R.** (2014). A critical season approach to Allen's rule: Bill size  
582 declines with winter temperature in a cold temperate environment. *J. Biogeogr.* 114–120.
- 583 **Danner, R. M., Greenberg, R. and Sillett, T. S.** (2014). The implications of increased body  
584 size in the song sparrows of the California Islands. *Monogr. West. North Am. Nat.* **7**, 348–  
585 356.
- 586 **Danner, R. M., Gulson-castillo, E. R., James, H. F., Dzielski, S. A., Iii, D. C. F., Sibbald, E.**  
587 **T. and Winkler, D. W.** (2017). Habitat-specific divergence of air conditioning structures in  
588 bird bills. *Auk* **134**, 65–75.
- 589 **Dawson, W. R.** (1981). Evaporative losses of water by birds. *Comp. Biochem. Physiol. A. Mol.*  
590 *Integr. Physiol.* **71A**, 495–509.
- 591 **De León, L. F., Podos, J., Gardezi, T., Herrel, A. and Hendry, A. P.** (2014). Darwin's finches  
592 and their diet niches: The sympatric coexistence of imperfect generalists. *J. Evol. Biol.* **27**,  
593 1093–1104.
- 594 **Demery, Z. P., Chappell, J. and Martin, G. R.** (2011). Vision, touch and object manipulation  
595 in senegal parrots *Poicephalus senegalus*. *Proc. R. Soc. B Biol. Sci.* **278**, 3687–3693.
- 596 **Diamond, J. M.** (1970). Ecological consequences of island colonization by southwest Pacific  
597 birds, I. Types of niche shifts. *Proc. Natl. Acad. Sci.* **67**, 529–536.

- 598 **Egea-Serrano, A., Hangartner, S., Laurila, A. and Räsänen, K.** (2014). Multifarious selection  
599 through environmental change: Acidity and predator-mediated adaptive divergence in the  
600 moor frog (*Rana arvalis*). *Proc. R. Soc. B Biol. Sci.* **281**, 20133266.
- 601 **Fayet, A. L., Hansen, E. S. and Biro, D.** (2020). Evidence of tool use in a seabird. *Proc. Natl.*  
602 *Acad. Sci. U. S. A.* **117**, 1277–1279.
- 603 **Friedman, N. R., Miller, E. T., Ball, J. R., Kasuga, H., Remeš, V. and Economo, E. P.**  
604 (2019). Evolution of a multifunctional trait: Shared effects of foraging ecology and  
605 thermoregulation on beak morphology, with consequences for song evolution. *Proc. R. Soc.*  
606 *B Biol. Sci.* **286**,.
- 607 **Gardner, J. L., Symonds, M. R. E., Joseph, L., Ikin, K., Stein, J. and Kruuk, L. E. B.**  
608 (2016). Spatial variation in avian bill size is associated with humidity in summer among  
609 Australian passerines. *Clim. Chang. Responses* **3**, 1–11.
- 610 **Gentle, M. J., Hughes, B. O. and Hubrecht, R. C.** (1982). The effect of beak trimming on food  
611 intake, feeding behaviour and body weight in adult hens. *Appl. Anim. Ethol.* **8**, 147–159.
- 612 **Ghalambor, C. K., Walker, J. A. and Reznick, D. N.** (2003). Multi-trait selection, adaptation,  
613 and constraints on the evolution of burst swimming performance. *Integr. Comp. Biol.* **438**,  
614 431–438.
- 615 **Grant, P. R.** (1983). Inheritance of size and shape in a population of Darwin's finches, *Geospiza*  
616 *cinerostris*. *Proc. R. Soc. London - Biol. Sci.* **220**, 219–236.
- 617 **Grant, P. R. and Grant, B. R.** (2002). Adaptive radiation of Darwin's finches. *Am. Sci.* **90**,  
618 130–139.
- 619 **Greenberg, R. and Danner, R. M.** (2012). The influence of the California marine layer on bill  
620 size in a generalist songbird. *Evolution* **66**, 3825–35.
- 621 **Greenberg, R. and Danner, R. M.** (2013). Climate, ecological release and bill dimorphism in  
622 an island songbird. *Biol. Lett.* **9**, 20130118.
- 623 **Greenberg, R., Cadena, V., Danner, R. M. and Tattersall, G. J.** (2012). Heat loss may  
624 explain bill size differences between birds occupying different habitats. *PLoS One* **7**,  
625 e40933.
- 626 **Greenberg, R., Etterson, M. and Danner, R. M.** (2013). Seasonal dimorphism in the horny  
627 bills of sparrows. *Ecol. Evol.* **3**, 389–98.
- 628 **Hagan, A. and Heath, J. E.** (1980). Regulation of heat loss in the duck by vasomotion in the  
629 bill. *J. Therm. Biol.* **5**, 95–101.
- 630 **Herrel, A., Spithoven, L., Van Damme, R. and De Vree, F.** (1999). Sexual dimorphism of  
631 head size in *Gallotia galloti*: Testing the niche divergence hypothesis by functional  
632 analyses. *Funct. Ecol.* **13**, 289–297.
- 633 **Herrel, A., Podos, J., Huber, S. K. and Hendry, A. P.** (2005). Evolution of bite force in  
634 Darwin's finches: A key role for head width. *J. Evol. Biol.* **18**, 669–675.
- 635 **Herrel, A., Soons, J., Aerts, P., Dirckx, J., Boone, M., Jacobs, P., Adriaens, D. and Podos, J.**  
636 (2010). Adaptation and function of the bills of Darwin's finches: Divergence by feeding type  
637 and sex. *Emu* **110**, 39–47.

- 638 **Hijmans, R. J., Cameron, S. E., Parra, J. L., Jones, P. G. and Jarvis, A.** (2005). Very high  
639 resolution interpolated climate surfaces for global land areas. *Int. J. Climatol.* **25**, 1965–  
640 1978.
- 641 **Jensen, H., Saether, B.-E., Ringsby, T. H., Tufto, J., Griffith, S. C. and Ellegren, H.** (2003).  
642 Sexual variation in heritability and genetic correlations of morphological traits in house  
643 sparrow (*Passer domesticus*). *J. Evol. Biol.* **16**, 1296–1307.
- 644 **Jones, J. S., Leith, B. H. and Rawlings, P.** (1977). Polymorphism in *Cepaea*: A problem with  
645 too many solutions? *Annu. Rev. Ecol. Syst.* **8**, 109–143.
- 646 **Junak, S., Knapp, D. A., Haller, J. R., Philbrick, R., Schoenherr, A. and Keeler-Wolf, T.**  
647 (2007). The California Channel Islands. In *Terrestrial Vegetation of California*, p.  
648 University of California Press.
- 649 **Kawecki, T. J. and Ebert, D.** (2004). Conceptual issues in local adaptation. *Ecol. Lett.* **7**, 1225–  
650 1241.
- 651 **Keast, A.** (1970). Adaptive evolution and shifts in niche occupation in island birds. *Assoc. Trop.*  
652 *Biol. Conserv.* **2**, 61–75.
- 653 **Keller, L. F., Grant, P. R., Rosemary Grant, B. and Petren, K.** (2001). Heritability of  
654 morphological traits in Darwin’s finches: Misidentified paternity and maternal effects.  
655 *Heredity* **87**, 325–336.
- 656 **Kim, S. Y., Noguera, J. C., Morales, J. and Velando, A.** (2011). Quantitative genetic evidence  
657 for trade-off between growth and resistance to oxidative stress in a wild bird. *Evol. Ecol.* **25**,  
658 461–472.
- 659 **Labarbera, K., Marsh, K. J., Hayes, K. R. R. and Hammond, T. T.** (2020). Context-  
660 dependent effects of relative temperature extremes on bill morphology in a songbird. *R. Soc.*  
661 *Open Sci.* **7**, 192203
- 662 **LaBarbera, K., Hayes, K. R., Marsh, K. J. and Lacey, E. A.** (2017). Complex relationships  
663 among environmental conditions and bill morphology in a generalist songbird. *Evol. Ecol.*  
664 **31**, 707–724.
- 665 **Laiolo, P. and Rolando, A.** (2001). Ecogeographic correlates of morphometric variation in the  
666 red-billed Chough *Pyrrhocorax pyrrhocorax* and the Alpine Chough *Pyrrhocorax graculus*.  
667 *Ibis* **143**, 602–616.
- 668 **Lamichhaney, S., Berglund, J., Almén, M. S., Maqbool, K., Grabherr, M., Martinez-**  
669 **Barrio, A., Promerová, M., Rubin, C.-J., Wang, C., Zamani, N., et al.** (2015). Evolution  
670 of Darwin’s finches and their beaks revealed by genome sequencing. *Nature* **518**, 371–375.
- 671 **Langin, K. M., Sillett, T. S., Funk, W. C., Morrison, S. A., Desrosiers, M. A. and**  
672 **Ghalambor, C. K.** (2015). Islands within an island: Repeated adaptive divergence in a  
673 single population. *Evolution (N. Y.)*. **69**, 653–665.
- 674 **Lerner, H. R. L., Meyer, M., James, H. F., Hofreiter, M. and Fleischer, R. C.** (2011).  
675 Multilocus resolution of phylogeny and timescale in the extant adaptive radiation of  
676 Hawaiian honeycreepers. *Curr. Biol.* **21**, 1838–1844.
- 677 **Lima, S. L. and Dill, L. M.** (1990). Behavioral decisions made under the risk of predation: A



- 678 review and prospectus. *Can. J. Zool.* **68**, 619–640.
- 679 **Luther, D. and Greenberg, R.** (2014). Habitat type and ambient temperature contribute to bill  
680 morphology. *Ecol. Evol.* **4**, 699–705.
- 681 **MacColl, A. D. C.** (2011). The ecological causes of evolution. *Trends Ecol. Evol.* **26**, 514–522.
- 682 **Mair, P. and de Leeuw, J.** (2019). Gifi: Multivariate Analysis with Optimal Scaling.
- 683 **Mckechnie, A. E. and Wolf, B. O.** (2010). Climate change increases the likelihood of  
684 catastrophic avian mortality events during extreme heat waves. *Biol. Lett.* **6**, 253–256.
- 685 **Navalón, G., Bright, J. A., Marugán-Lobón, J. and Rayfield, E. J.** (2019). The evolutionary  
686 relationship among beak shape, mechanical advantage, and feeding ecology in modern  
687 birds. *Evolution* **73**, 422–435.
- 688 **Nebel, S., Jackson, D. L. and Elner, R. W.** (2005). Functional association of bill morphology  
689 and foraging behaviour in calidrid sandpipers. *Anim. Biol.* **55**, 235–243.
- 690 **Noakes, M., Wolf, B. and McKechnie, A.** (2016). Seasonal and geographical variation in heat  
691 tolerance and evaporative cooling capacity in a passerine bird. *J. Exp. Biol.* **219**, 859–869.
- 692 **Parchman, T. L., Benkman, C. W. and Britch, S. C.** (2006). Patterns of genetic variation in  
693 the adaptive radiation of New World crossbills (Aves: Loxia). *Mol. Ecol.* **15**, 1873–1887.
- 694 **Pfrender, M. E.** (2012). Triangulating the genetic basis of adaptation to multifarious selection.  
695 *Mol. Ecol.* **21**, 2051–2053.
- 696 **Podos, J.** (2001). Correlated evolution of morphology and vocal signal structure in Darwin’s  
697 finches. *Nature* **409**, 185–188.
- 698 **Podos, J. and Nowicki, S.** (2004). Beaks, adaptation, and vocal evolution in Darwin’s finches.  
699 *Bioscience* **54**, 501.
- 700 **Reznick, D. N. and Travis, J.** (1996). The empirical study of adaptations in natural populations.  
701 In *Adaptations* (ed. Rose, M. R.) and Lauder, G. V.), pp. 243–290. San Diego, California:  
702 Academic Press.
- 703 **Rising, J. D. and Somers, K. M.** (1989). The measurement of overall body size in birds. *Auk*  
704 **106**, 666–674.
- 705 **Robinson, M. R., Pilkington, J. G., Clutton-Brock, T. H., Pemberton, J. M. and Kruuk, L.**  
706 **E. B.** (2006). Live fast, die young: Trade-offs between fitness components and sexually  
707 antagonistic selection on weaponry in soay sheep. *Evolution* **60**, 2168.
- 708 **Rutz, C., Klump, B. C., Komarczyk, L., Leighton, R., Kramer, J., Wischniewski, S.,**  
709 **Sugasawa, S., Morrissey, M. B., James, R., St Clair, J. J. H., et al.** (2016). Discovery of  
710 species-wide tool use in the Hawaiian crow. *Nature* **537**, 403–407.
- 711 **Ryeland, J., Weston, M. A. and Symonds, M. R. E.** (2017). Bill size mediates behavioural  
712 thermoregulation in birds. *Funct. Ecol.* **31**, 885–893.
- 713 **Schoennerr, A. A., Feldmeth, C. R. and Emerson, M. J.** (2003). *The Natural History of the*  
714 *Islands of California*. Berkeley: University of California Press.
- 715 **Scott, S. N., Clegg, S. M., Blomberg, S. P., Kikkawa, J. and Owens, I. P. F.** (2003).  
716 Morphological shifts in island-dwelling birds: The roles of generalist foraging and niche



- 717 expansion. *Evolution* **57**, 2147–2156.
- 718 **Shuford, W. D. and Gardali, T. eds.** (2008). Channel Island song sparrow. In *California bird*  
719 *species of special concern: A ranked assessment of species, subspecies, and distinct*  
720 *populations of birds of immediate conservation concern in California. Studies of Western*  
721 *Birds I.*, p. Camarillo, CA: Western Field Ornithologists and California Department of Fish  
722 and Game.
- 723 **Shultz, A. J. and Burns, K. J.** (2017). The role of sexual and natural selection in shaping  
724 patterns of sexual dichromatism in the largest family of songbirds (Aves: Thraupidae).  
725 *Evolution* **71**, 1061–1074.
- 726 **Siepielski, A. M., DiBattista, J. D. and Carlson, S. M.** (2009). It's about time: The temporal  
727 dynamics of phenotypic selection in the wild. *Ecol. Lett.* **12**, 1261–76.
- 728 **Siepielski, A. M., Gotanda, K. M., Morrissey, M. B., Diamond, S. E., DiBattista, J. D. and**  
729 **Carlson, S. M.** (2013). The spatial patterns of directional phenotypic selection. *Ecol. Lett.*  
730 **16**, 1382–92.
- 731 **Soons, J., Genbrugge, A., Podos, J., Adriaens, D., Aerts, P., Dirckx, J. and Herrel, A.**  
732 (2015). Is beak morphology in Darwin's finches tuned to loading demands? *PLoS One* **10**,
- 733 **Sustaita, D.** (2007). Musculoskeletal underpinnings to differences in killing behavior between  
734 North American accipiters (Falconiformes: Accipitridae) and falcons (Falconidae). *J.*  
735 *Morphol.* **269**, 283–301.
- 736 **Svensson, E. I. and Calsbeek, R. eds.** (2012). *The adaptive landscape in evolutionary biology.*  
737 Oxford, United Kingdom: Oxford University Press.
- 738 **Symonds, M. R. E. and Tattersall, G. J.** (2010). Geographical variation in bill size across bird  
739 species provides evidence for Allen's rule. *Am. Nat.* **176**, 188–97.
- 740 **Tattersall, G. J., Andrade, D. V and Abe, A. S.** (2009). Heat exchange from the toucan bill  
741 reveals a controllable vascular thermal radiator. *Science* **325**, 468–70.
- 742 **Tattersall, G. J., Arnaut, B. and Symonds, M. R. E.** (2016). The evolution of the avian bill as  
743 a thermoregulatory organ. *Biol. Rev.*
- 744 **Tattersall, G. J., Chaves, J. A. and Danner, R. M.** (2018). Thermoregulatory windows in  
745 Darwin's finches. *Funct. Ecol.* **32**, 358–368.
- 746 **Temeles, E. J. and Kress, W. J.** (2003). Adaptation in a plant-hummingbird association.  
747 *Science* **300**, 630–633.
- 748 **Temeles, E. J., Roberts, W. M., Url, S. and Mark, W.** (1993). Dimorphism in bill length on  
749 foraging behavior: An experimental analysis of hummingbirds. *Oecologia* **94**, 87–94.
- 750 **Templeton, C. N. and Shriner, W. M.** (2004). Multiple selection pressures influence  
751 Trinidadian guppy (*Poecilia reticulata*) antipredator behavior. *Behav. Ecol.* **15**, 673–678.
- 752 **Tieleman, B. I., Williams, J. B., Buschur, M. E. and Brown, C. R.** (2003). Phenotypic  
753 variation of larks along an aridity gradient: Are desert birds more flexible? *Ecology* **84**,  
754 1800–1815.
- 755 **Troscianko, J., Von Bayern, A. M. P., Chappell, J., Rutz, C. and Martin, G. R.** (2012).  
756 Extreme binocular vision and a straight bill facilitate tool use in New Caledonian crows.

- 757 *Nat. Commun.* **3**, 1-7.
- 758 **Van Der Meij, M. A. A. and Bout, R. G.** (2004). Scaling of jaw muscle size and maximal bite  
759 force in finches. *J. Exp. Biol.* **207**, 2745–2753.
- 760 **Van Der Meij, M. A. A. and Bout, R. G.** (2006). Seed husking time and maximal bite force in  
761 finches. *J. Exp. Biol.* **209**, 3329–3335.
- 762 **Van Der Meij, M. A. A. and Bout, R. G.** (2008). The relationship between shape of the skull  
763 and bite force in finches. *J. Exp. Biol.* **211**, 1668–1680.
- 764 **White, C. R., Blackburn, T. M., Martin, G. R. and Butler, P. J.** (2007). Basal metabolic rate  
765 of birds is associated with habitat temperature and precipitation, not primary productivity.  
766 *Proc. Biol. Sci.* **274**, 287–93.
- 767 **Whitfield, M. C., Smit, B., McKechnie, A. E. and Wolf, B. O.** (2015). Avian thermoregulation  
768 in the heat: scaling of heat tolerance and evaporative cooling capacity in three southern  
769 African arid-zone passerines. *J. Exp. Biol.* **218**, 1705–1714.
- 770 **Wilkins, M. R., Seddon, N. and Safran, R. J.** (2013). Evolutionary divergence in acoustic  
771 signals: Causes and consequences. *Trends Ecol. Evol.* **28**, 156–166.
- 772 **Wolf, B. O. and Walsberg, G. E.** (2000). The role of the plumage in heat transfer processes of  
773 birds. *Am. Zool.* **40**, 575–584.
- 774

775 **LIST OF SYMBOLS AND ABBREVIATIONS**

776

|                           |                                                                                                                                          |
|---------------------------|------------------------------------------------------------------------------------------------------------------------------------------|
| <b>PC1<sub>bod</sub></b>  | body size; composite score of body size based on PCA of tarsometatarsus and wing lengths used to estimate residual bill surface area     |
| <b>PC1<sub>veg</sub></b>  | primary axis of variation in vegetation; composite score of vegetation based on NLPCA of common vegetation types in sampling locations   |
| <b>PC2<sub>veg</sub></b>  | secondary axis of variation in vegetation; composite score of vegetation based on NLPCA of common vegetation types in sampling locations |
| <b>PC1<sub>bill</sub></b> | primary axis of variation in bill dimensions; composite score of bill depth, width, and length used in analysis of foraging efficiency   |
| <b>T</b>                  | maximum environmental temperature (in July) of sampling location                                                                         |

777

778

779 **TABLE & FIGURE LEGENDS**

780

781 **Table 1. Nonparametric pairwise island comparisons (median±c.i.) for song sparrow raw**  
782 **(uncorrected for body size) and residual (corrected for body size) bill surface areas,**  
783 **maximum environmental temperatures (T), and vegetation dimensions (PC1, PC2).**

784 Pairwise comparisons were estimated using the Hodges-Lehmann method for bill surface areas  
785 in 542 birds (San Miguel Island,  $n = 104$ ; Santa Rosa Island,  $n = 194$ ; Santa Cruz Island,  $n =$   
786  $244$ ) and for temperature and vegetation characteristics across 432 unique sampling locations  
787 (San Miguel Island,  $n = 68$ ; Santa Rosa Island,  $n = 141$ ; Santa Cruz Island,  $n = 223$ ). Vegetation  
788 dimensions include PC1 and PC2 from nonlinear PCA of ranked abundance in vegetation  
789 categories within breeding song sparrow territories. All islands had significantly different ( $P <$   
790  $0.05$ ) mean ranks in all bill and environmental variables based on nonparametric Kruskal-Wallis  
791 tests. Post-hoc Mann-Whitney U 95% confidence intervals around differences in mean ranks are  
792 shown in parentheses. Bill surface area analyses include only adult, breeding, territorial birds  
793 with complete phenotype measurements, and maximum temperature was extracted only for these  
794 unique sampling locations. Vegetation sampling occurred at most of these temperature sampling  
795 locations and at locations for territorial birds that did not have complete phenotype  
796 measurements.

797

798 **Figure 1. Sampling locations for comparison of song sparrow bill morphology (grey**  
799 **circles), seed extraction time (red triangles), and maximum bite force (red boxed regions)**  
800 **across three climatically-distinct islands (A) and measurements of bill length, depth (B),**  
801 **and width (C) used for quantifying bill morphology. Bill length ( $l$ ), depth ( $d$ ), and width ( $w$ )**  
802 **were taken from the anterior edge of the nares and used to calculate residual (body-size**  
803 **corrected) bill surface area following Greenberg and Danner (2012). All sampling was conducted**  
804 **during the breeding season (February-June) from 2014-2016. Inset shows the location of the**  
805 **northern Channel Islands with respect to California.**

806

807 **Figure 2. Variable loadings (A) and PC1, PC2, and 95% kernel density contours by island**  
808 **(B) from nonlinear PCA of vegetation within song sparrow territories. Sampling of 432**

809 unique sampling locations occurred during the breeding season from 2014-2016 on San Miguel  
810 Island (blue;  $n = 68$ ), Santa Rosa Island (orange;  $n = 141$ ), and Santa Cruz Island (red;  $n = 223$ ).

811

812 **Figure 3. Residual bill surface area predicted by maximum temperature in song sparrows**

813 **( $n = 446$ ) on the California Channel Islands.** Residual bill surface area is total bill surface area

814 corrected for skeletal body size and calculated from measures of bill depth, width, and length,

815 tarsometatarsus length, and wing length in adult song sparrows on San Miguel Island ( $n = 81$ ),

816 Santa Rosa Island (orange,  $n = 147$ ), and Santa Cruz Island (red,  $n = 218$ ). Primary and

817 secondary axes of variation from nonlinear PCA of vegetation ( $PC1_{veg}$  and  $PC2_{veg}$ ) were included

818 in the linear regression analysis and were not significant predictors of residual bill surface area.

819

820 **Figure 4. Relationship between song sparrow bill dimensions and foraging traits**

821 **[maximum bite force (A) and seed extraction time (B)] between birds on Santa Cruz Island**

822 **(red;  $n_A = 28$ ,  $n_B = 23$ ) and San Miguel Island (blue;  $n_A = 28$ ,  $n_B = 10$ ).**  $PC1_{bill}$  is the first

823 orthogonal axis in a PCA of bill depth, width, and length taken from the anterior edge of the

824 nares.

825

826 **Table 1. Nonparametric pairwise island comparisons (median±c.i.) for song sparrow raw (uncorrected for body size) and**  
 827 **residual (corrected for body size) bill surface areas, maximum environmental temperatures (T), and vegetation dimensions**  
 828 **(PC1, PC2).** Pairwise comparisons were estimated using the Hodges-Lehmann method for bill surface areas in 542 birds (San Miguel  
 829 Island,  $n = 104$ ; Santa Rosa Island,  $n = 194$ ; Santa Cruz Island,  $n = 244$ ) and for temperature and vegetation characteristics across 432  
 830 unique sampling locations (San Miguel Island,  $n = 68$ ; Santa Rosa Island,  $n = 141$ ; Santa Cruz Island,  $n = 223$ ). Vegetation dimensions  
 831 include PC1 and PC2 from nonlinear PCA of ranked abundance in vegetation categories within breeding song sparrow territories. All  
 832 islands had significantly different ( $P < 0.05$ ) mean ranks in all bill and environmental variables based on nonparametric Kruskal-  
 833 Wallis tests. Post-hoc Mann-Whitney U 95% confidence intervals around differences in mean ranks are shown in parentheses. Bill  
 834 surface area analyses include only adult, breeding, territorial birds with complete phenotype measurements, and maximum  
 835 temperature was extracted only for these unique sampling locations. Vegetation sampling occurred at most of these temperature  
 836 sampling locations and at locations for territorial birds that did not have complete phenotype measurements.

| Island Comparison       | Bill Surface Area      |                     | Maximum T           | Vegetation                 |                            |
|-------------------------|------------------------|---------------------|---------------------|----------------------------|----------------------------|
|                         | Raw (mm <sup>2</sup> ) | Residual            | T (°C)              | PC1 <sub>veg</sub> (30.4%) | PC2 <sub>veg</sub> (22.2%) |
|                         | 2.32 <sup>***</sup>    | 2.72 <sup>***</sup> | 1.00 <sup>***</sup> | 0.35 <sup>***</sup>        | 1.38 <sup>***</sup>        |
| Santa Cruz – Santa Rosa | (1.33 - 3.28)          | (1.77 - 3.70)       | (0.80 - 1.10)       | (0.22 - 0.54)              | (1.20 - 1.55)              |
|                         | 7.67 <sup>***</sup>    | 7.67 <sup>***</sup> | 1.80 <sup>***</sup> | -0.34                      | 1.36 <sup>***</sup>        |
| Santa Cruz – San Miguel | (6.58 - 8.76)          | (6.58 - 8.76)       | (1.70 - 1.90)       | (-0.67 - 0.00)             | (1.13 - 1.59)              |
|                         | 5.49 <sup>***</sup>    | 5.03 <sup>***</sup> | 0.80 <sup>***</sup> | -0.81 <sup>***</sup>       | 0.00                       |
| Santa Rosa – San Miguel | (4.35 - 6.58)          | (3.93 - 6.11)       | (0.70 - 0.80)       | (-1.12 - -0.51)            | (-0.10 - 0.11)             |

\*Significant difference ( $P < 0.05$ ) in population distributions between islands based on Mann-Whitney U tests

837

838 **Figure 1. Sampling locations for comparison of song sparrow bill morphology (grey**  
839 **circles), seed extraction time (red triangles), and maximum bite force (red boxed regions)**  
840 **across three climatically-distinct islands (A) and measurements of bill length, depth (B),**  
841 **and width (C) used for quantifying bill morphology. Bill length ( $l$ ), depth ( $d$ ), and width ( $w$ )**  
842 **were taken from the anterior edge of the nares and used to calculate residual (body-size**  
843 **corrected) bill surface area following Greenberg and Danner (2012). All sampling was conducted**  
844 **during the breeding season (February-June) from 2014-2016. Inset shows the location of the**  
845 **northern Channel Islands with respect to California.**

846

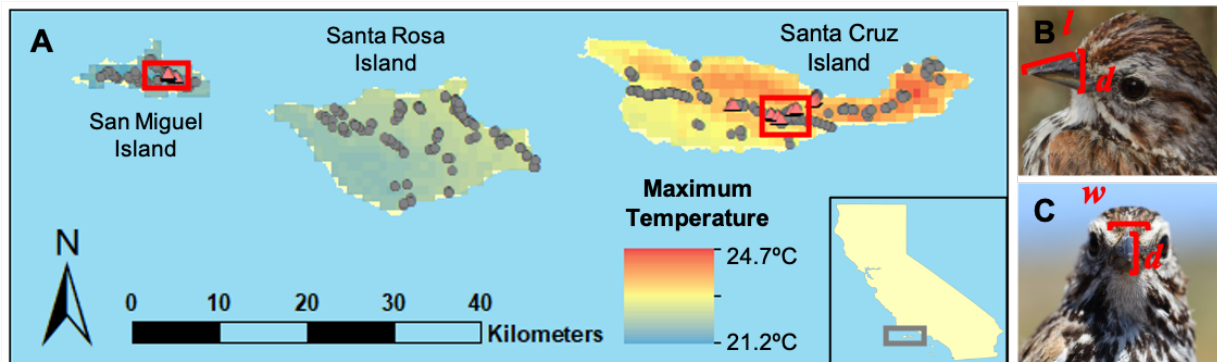



847 **Figure 2. Variable loadings (A) and PC1, PC2, and 95% kernel density contours by island (B) from nonlinear PCA of**  
 848 **vegetation within song sparrow territories.** Sampling of 432 unique sampling locations occurred during the breeding season from  
 849 2014-2016 on San Miguel Island (blue;  $n = 68$ ), Santa Rosa Island (orange;  $n = 141$ ), and Santa Cruz Island (red;  $n = 223$ ).

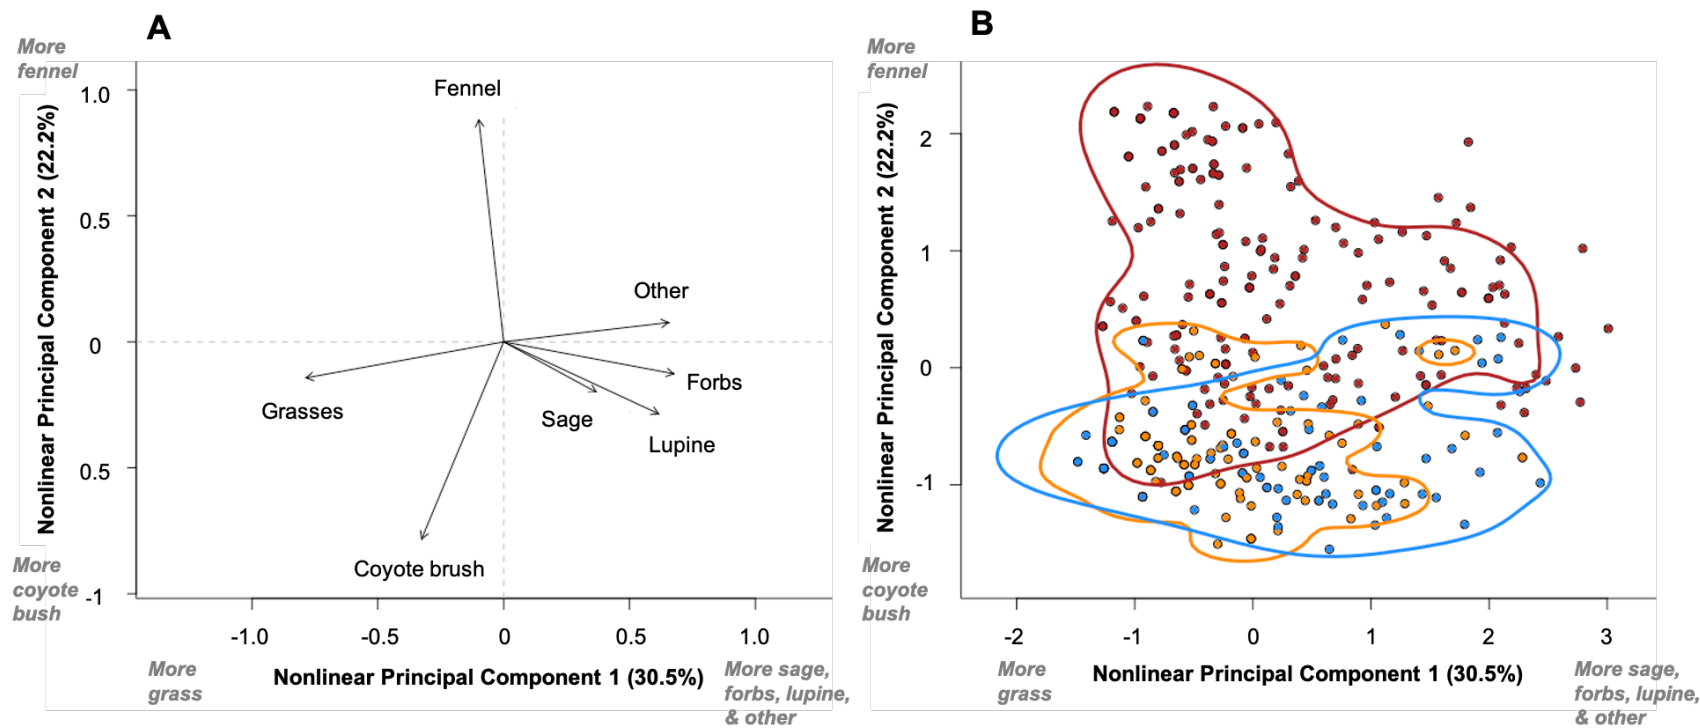

850

851 **Figure 3. Residual bill surface area predicted by maximum temperature in song sparrows**  
852 **( $n = 446$ ) on the California Channel Islands.** Residual bill surface area is total bill surface area  
853 corrected for skeletal body size and calculated from measures of bill depth, width, and length,  
854 tarsometatarsus length, and wing length in adult song sparrows on San Miguel Island ( $n = 81$ ),  
855 Santa Rosa Island (orange,  $n = 147$ ), and Santa Cruz Island (red,  $n = 218$ ). Primary and  
856 secondary axes of variation from nonlinear PCA of vegetation ( $PC1_{veg}$  and  $PC2_{veg}$ ) were included  
857 in the linear regression analysis and were not significant predictors of residual bill surface area.

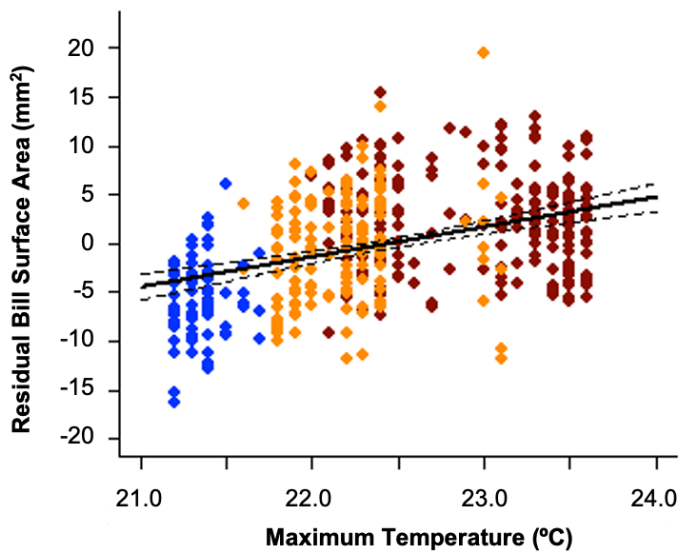

858

859 **Figure 4. Relationship between song sparrow bill dimensions and foraging traits**  
860 **[maximum bite force (A) and seed extraction time (B)] between birds on Santa Cruz Island**  
861 **(red;  $n_A = 28$ ,  $n_B = 23$ ) and San Miguel Island (blue;  $n_A = 28$ ,  $n_B = 10$ ).** PC1<sub>bill</sub> is the first  
862 orthogonal axis in a PCA of bill depth, width, and length taken from the anterior edge of the  
863 nares.

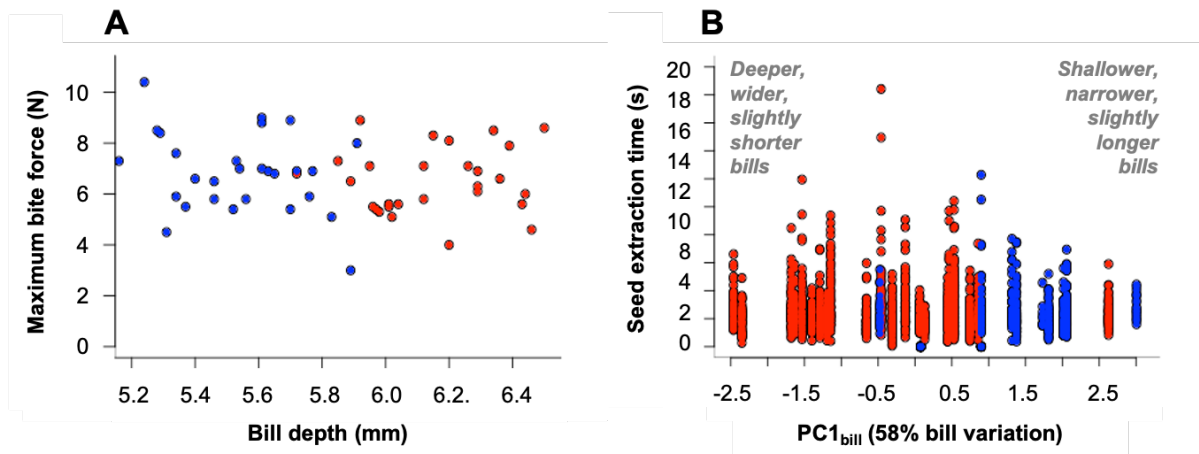

864
